# Supplementary material for: Oncological and functional outcomes of pathological fractures of lower extremities in patients with malignant bone tumors
Source: Research Square preprint supplement (doi:10.21203/rs.3.rs-3877674/v1), 2024-01-23
Supplement: Supplementary file 1 [file 35a9feb83f07a3957c3e7318.docx]

**Table 1**. Characteristics of the study population

| Factor | Patients, n |
| --- | --- |
| Age (mean years) | 68 |
| ≤70 | 22 |
| >70 | 16 |
| Sex |  |
| Male | 19 |
| Female | 19 |
| Fracture site |  |
| Femoral neck | 5 |
| Femoral diaphysis | 7 |
| Intertrochanteric | 8 |
| Subtrochanteric | 10 |
| Bilateral intertrochanteric | 3 |
| Proximal tibia | 3 |
| Distal femur | 2 |
| Type of cancer |  |
| Lung | 9 |
| Breast | 7 |
| Kidney | 3 |
| Multiple Myeloma | 3 |
| Osteosarcoma | 2 |
| Liver | 2 |
| Gastric | 2 |
| Unknown | 2 |
| Esophageal | 1 |
| Hemangiopericytoma | 1 |
| Paget | 1 |
| Neuroblastoma | 1 |
| Chondrosarcoma | 1 |
| N. metastasis |  |
| Equal or less than 3 | 10 |
| More than 3 | 20 |
| ECOG-PS |  |
| <2 | 20 |
| 2-3 | 16 |
| >3 | 2 |
| Adjuvant therapy |  |
| Radiotherapy | 5 |
| Chemotherapy | 8 |
| Chemotherapy and radiotherapy | 10 |
| None | 2 |
| Treatment modality |  |
| Intermedullary nail | 18 |
| Endoprosthesis | 4 |
| Fixation with plate | 3 |
| Bipolar head arthroplasty | 3 |
| Fixation with CHS | 3 |
| Bilateral intermedullary nail | 2 |
| Conservative | 2 |
| Artificial bone stem | 1 |
| Rt. Bipolar head arthroplasty, Lt. fixation with CHS | 1 |
| Operating time (min) |  |
| 0-100 | 18 |
| >100 | 18 |
| Blood loss |  |
| 0-60 | 17 |
| >60 | 19 |
| MSTS score |  |
| 0-10 | 9 |
| 11-20 | 7 |
| 21-30 | 22 |
| Outcome |  |
| CDF | 1 |
| AWD | 23 |
| DOD | 14 |
| Follow-up periods (months) |  |
| mean | 8 |
| range | 1-150 |

N, number; Rt, right side; Lt, left side; ECOG-PS, Eastern Cooperative Oncology Group (ECOG) score for performance status; CHS, compression hip screw; MSTS, Musculoskeletal Tumor Society; CDF, continuous disease-free; AWD, alive with disease; DOD, dead of disease.
